# Supplementary material for: Viewing Native American Cervical Cancer Disparities through the Lens of the Vaginal Microbiome: A Pilot Study
Source: PubMed Central journal article supplement — Cancer Prev Res (Phila). 2024 Aug 22;17(11):525–38. doi: 10.1158/1940-6207.CAPR-24-0286 (PMC11532753; doi:10.1158/1940-6207.capr-24-0286), 2024-08-22
Supplement: capr-24-0286_supplementary_figure_s1_suppsf1.pdf [file capr-24-0286_supplementary_figure_s1_suppsf1.pdf]

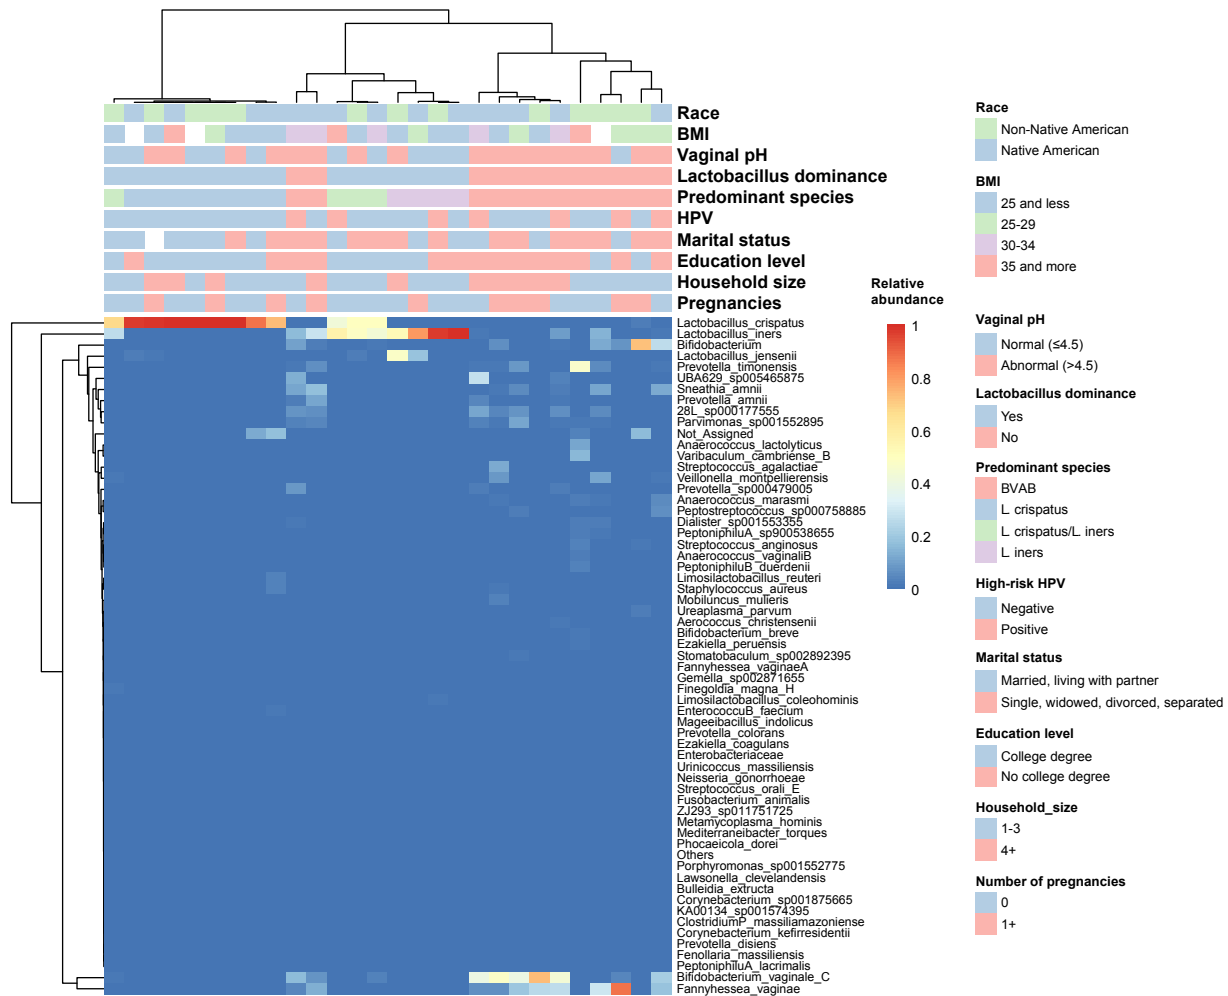

**Supplementary Figure S1. Vaginal microbiota profiles cluster based on *Lactobacillus* dominance and not clinical or sociodemographic factors.** Heatmap reflects the relative abundance of microbiome profiles from vaginal swabs across all the samples (n=28). Hierarchical clustering was based on correlation distance and average linkage. The analysis revealed two distinct clusters based on the *Lactobacillus* dominance ( $\geq 80\%$ ) profiles of this cohort. Annotations include Native racial group, HPV status, *Lactobacillus* dominance, predominant species, BMI group, educational level, household size, and number of pregnancies.
