# Supplementary material for: Viewing Native American Cervical Cancer Disparities through the Lens of the Vaginal Microbiome: A Pilot Study
Source: PubMed Central journal article supplement — Cancer Prev Res (Phila). 2024 Aug 22;17(11):525–38. doi: 10.1158/1940-6207.CAPR-24-0286 (PMC11532753; doi:10.1158/1940-6207.capr-24-0286), 2024-08-22
Supplement: capr-24-0286_supplementary_figure_s2_suppsf2.pdf [file capr-24-0286_supplementary_figure_s2_suppsf2.pdf]

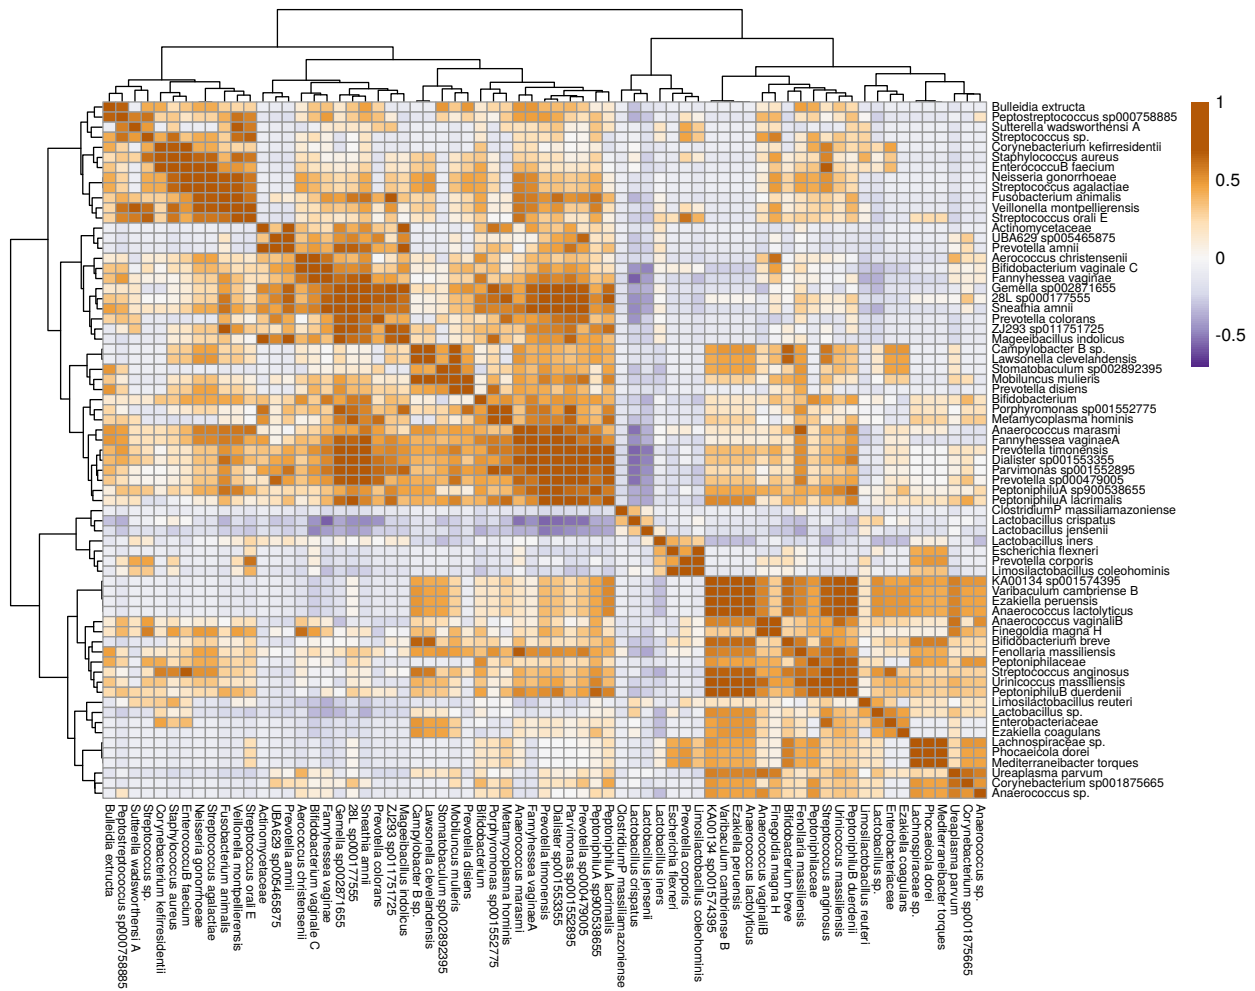

**Supplementary Figure S2. BV-associated bacteria positively correlate with each other and negatively correlate with *Lactobacillus* species, including *L. crispatus* and *L. jensenii*.**

Heatmap reflects the correlations between vaginal microbiota taxa at the species level across all the samples (n=28). Correlation coefficients were calculated using Spearman's rank correlation analysis. Hierarchical clustering of correlation coefficients was based on Euclidean distance and Ward linkage. Orange and purple-colored squares indicate positive and negative correlations, respectively.
