# Supplementary material for: Viewing Native American Cervical Cancer Disparities through the Lens of the Vaginal Microbiome: A Pilot Study
Source: PubMed Central journal article supplement — Cancer Prev Res (Phila). 2024 Aug 22;17(11):525–38. doi: 10.1158/1940-6207.CAPR-24-0286 (PMC11532753; doi:10.1158/1940-6207.capr-24-0286), 2024-08-22
Supplement: capr-24-0286_supplementary_figure_s3_suppsf3.pdf [file capr-24-0286_supplementary_figure_s3_suppsf3.pdf]

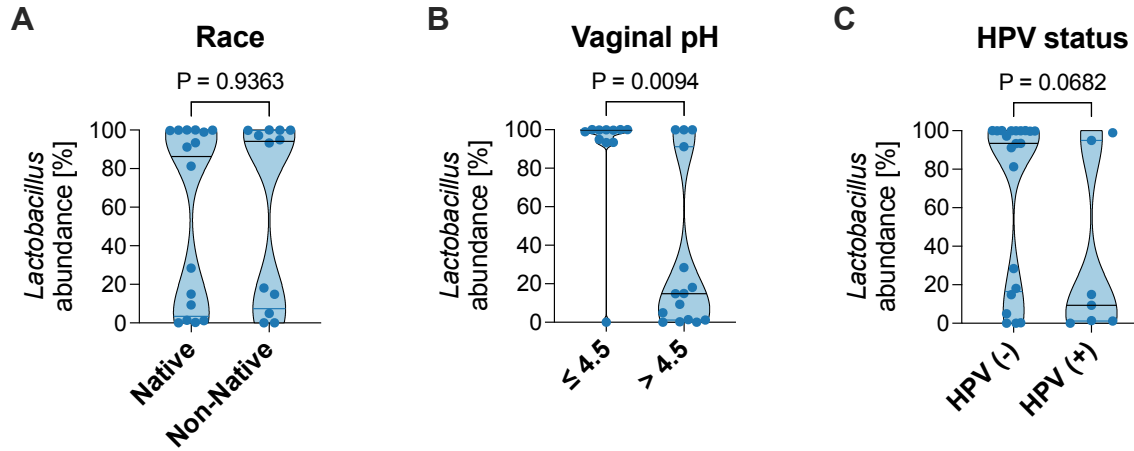

**Supplementary Figure S3. Associations of *Lactobacillus* abundance with race, vaginal pH, and HPV status.** Violin plots depict relative abundance of *Lactobacillus* spp. between the groups based on race (A), vaginal pH (B), and HPV status (C). *P* values were calculated using Wilcoxon rank sum test. *Lactobacillus* spp. were significantly more abundant in women with normal pH ( $\leq 4.5$ ) and tended to be more abundant in hrHPV-negative individuals. No difference in *Lactobacillus* abundance was observed between Native American or non-Native American women.
